# Supplementary material for: In Silico Studies on Sennidines—Natural Dianthrones from Senna
Source: MDPI journal article supplement (doi:10.3390/biology10060468), 2021-05-26
Supplement: s1 [file s1]

# SUPPORTING INFORMATION

**Table S1.** Electron Density  $\rho(r)$  and Energy Components  $V(r)$ ,  $G(r)$  at RCPs for Sennidin Structures,  $\sigma=0.00001$  [a.u.].

| Conformer | Ring | $\rho(r)$ [a.u.] | $V(r)$ [a.u.] | $G(r)$ [a.u.] |
|-----------|------|------------------|---------------|---------------|
| 1         | A    | 0.02130          | −0.02390      | 0.03109       |
|           | B    | 0.01855          | −0.01917      | 0.02531       |
|           | C    | 0.02139          | −0.02393      | 0.03114       |
|           | F    | 0.02130          | −0.02390      | 0.03109       |
|           | G    | 0.01855          | −0.01917      | 0.02531       |
|           | H    | 0.02139          | −0.02393      | 0.03114       |
| 2         | A    | 0.02116          | −0.02375      | 0.03103       |
|           | B    | 0.01893          | −0.01977      | 0.02599       |
|           | C    | 0.02149          | −0.02404      | 0.03122       |
|           | F    | 0.02115          | −0.02373      | 0.03101       |
|           | G    | 0.01889          | −0.01970      | 0.02593       |
|           | H    | 0.02150          | −0.02406      | 0.03125       |
| 3         | A    | 0.02148          | −0.02416      | 0.03139       |
|           | B    | 0.01877          | −0.01958      | 0.02579       |
|           | C    | 0.02153          | −0.02413      | 0.03127       |
|           | F    | 0.02148          | −0.02416      | 0.03139       |
|           | G    | 0.01877          | −0.01958      | 0.02579       |
|           | H    | 0.02153          | −0.02413      | 0.03127       |
| 4         | A    | 0.02118          | −0.02378      | 0.03107       |
|           | B    | 0.01884          | −0.01965      | 0.02588       |
|           | C    | 0.02131          | −0.02384      | 0.03099       |
|           | F    | 0.02118          | −0.02378      | 0.03107       |
|           | G    | 0.01884          | −0.01966      | 0.02588       |
|           | H    | 0.02131          | −0.02384      | 0.03099       |
| 5         | A    | 0.02116          | −0.02374      | 0.03101       |
|           | B    | 0.01891          | −0.01974      | 0.02598       |
|           | C    | 0.02146          | −0.02401      | 0.03119       |
|           | F    | 0.02118          | −0.02378      | 0.03104       |
|           | G    | 0.01897          | −0.01982      | 0.02605       |
|           | H    | 0.02150          | −0.02407      | 0.03124       |
| 6         | A    | 0.02122          | −0.02381      | 0.03107       |
|           | B    | 0.01898          | −0.01981      | 0.02604       |
|           | C    | 0.02146          | −0.02401      | 0.03115       |
|           | F    | 0.02122          | −0.02381      | 0.03107       |
|           | G    | 0.01898          | −0.01981      | 0.02604       |
|           | H    | 0.02146          | −0.02401      | 0.03115       |
| 7         | A    | 0.02127          | −0.02387      | 0.03112       |
|           | B    | 0.01855          | −0.01917      | 0.02532       |
|           | C    | 0.02145          | −0.02398      | 0.03114       |
|           | F    | 0.02131          | −0.02391      | 0.03110       |
|           | G    | 0.01855          | −0.01919      | 0.02533       |

|    |   |         |          |         |
|----|---|---------|----------|---------|
|    | H | 0.02140 | −0.02394 | 0.03114 |
| 8  | A | 0.02125 | −0.02385 | 0.03111 |
|    | B | 0.01848 | −0.01907 | 0.02521 |
|    | C | 0.02143 | −0.02394 | 0.03110 |
|    | F | 0.02129 | −0.02388 | 0.03107 |
|    | G | 0.01851 | −0.01914 | 0.02528 |
|    | H | 0.02139 | −0.02393 | 0.03114 |
| 9  | A | 0.02123 | −0.02383 | 0.03109 |
|    | B | 0.01849 | −0.01912 | 0.02528 |
|    | C | 0.02145 | −0.02406 | 0.03124 |
|    | F | 0.02129 | −0.02388 | 0.03106 |
|    | G | 0.01865 | −0.01933 | 0.02549 |
|    | H | 0.02135 | −0.02387 | 0.03108 |
| 10 | A | 0.02130 | −0.02390 | 0.03114 |
|    | B | 0.01864 | −0.01931 | 0.02547 |
|    | C | 0.02143 | −0.02393 | 0.03108 |
|    | F | 0.02130 | −0.02390 | 0.03109 |
|    | G | 0.01854 | −0.01917 | 0.02532 |
|    | H | 0.02149 | −0.02406 | 0.03120 |
| 11 | A | 0.02130 | −0.02389 | 0.03109 |
|    | B | 0.01854 | −0.01915 | 0.02530 |
|    | C | 0.02139 | −0.02393 | 0.03114 |
|    | F | 0.02131 | −0.02392 | 0.03112 |
|    | G | 0.01854 | −0.01918 | 0.02534 |
|    | H | 0.02135 | −0.02392 | 0.03113 |
| 12 | A | 0.02124 | −0.02383 | 0.03108 |
|    | B | 0.01894 | −0.01975 | 0.02598 |
|    | C | 0.02143 | −0.02398 | 0.03119 |
|    | F | 0.02128 | −0.02389 | 0.03114 |
|    | G | 0.01903 | −0.01989 | 0.02611 |
|    | H | 0.02138 | −0.02394 | 0.03111 |
| 13 | A | 0.02145 | −0.02412 | 0.03135 |
|    | B | 0.01885 | −0.01970 | 0.02592 |
|    | C | 0.02153 | −0.02413 | 0.03128 |
|    | F | 0.02150 | −0.02419 | 0.03143 |
|    | G | 0.01870 | −0.01948 | 0.02567 |
|    | H | 0.02148 | −0.02407 | 0.03119 |
| 14 | A | 0.02122 | −0.02382 | 0.03108 |
|    | B | 0.01859 | −0.01928 | 0.02548 |
|    | C | 0.02139 | −0.02398 | 0.03114 |
|    | F | 0.02120 | −0.02379 | 0.03105 |
|    | G | 0.01866 | −0.01939 | 0.02559 |
|    | H | 0.02141 | −0.02397 | 0.03111 |
| 15 | A | 0.02125 | −0.02385 | 0.03110 |
|    | B | 0.01900 | −0.01985 | 0.02608 |
|    | C | 0.02147 | −0.02405 | 0.03126 |

|    |   |         |          |         |
|----|---|---------|----------|---------|
|    | F | 0.02126 | −0.02386 | 0.03111 |
|    | G | 0.01900 | −0.01984 | 0.02606 |
|    | H | 0.02132 | −0.02387 | 0.03106 |
| 16 | A | 0.02121 | −0.02381 | 0.03107 |
|    | B | 0.01893 | −0.01975 | 0.02598 |
|    | C | 0.02140 | −0.02392 | 0.03110 |
|    | F | 0.02123 | −0.02383 | 0.03108 |
|    | G | 0.01902 | −0.01990 | 0.02613 |
|    | H | 0.02151 | −0.02414 | 0.03127 |
| 17 | A | 0.02129 | −0.02386 | 0.03105 |
|    | B | 0.01861 | −0.01927 | 0.02544 |
|    | C | 0.02132 | −0.02385 | 0.03109 |
|    | F | 0.02123 | −0.02384 | 0.03111 |
|    | G | 0.01844 | −0.01903 | 0.02518 |
|    | H | 0.02135 | −0.02391 | 0.03106 |
| 18 | A | 0.02132 | −0.02392 | 0.03112 |
|    | B | 0.01867 | −0.01938 | 0.02556 |
|    | C | 0.02156 | −0.02416 | 0.03135 |
|    | F | 0.02130 | −0.02391 | 0.03115 |
|    | G | 0.01873 | −0.01948 | 0.02565 |
|    | H | 0.02146 | −0.02405 | 0.03119 |
| 19 | A | 0.02130 | −0.02387 | 0.03110 |
|    | B | 0.01890 | −0.01972 | 0.02591 |
|    | C | 0.02152 | −0.02407 | 0.03123 |
|    | F | 0.02138 | −0.02401 | 0.03120 |
|    | G | 0.01865 | −0.01940 | 0.02557 |
|    | H | 0.02147 | −0.02402 | 0.03119 |
| 20 | A | 0.02131 | −0.02390 | 0.03114 |
|    | B | 0.01873 | −0.01945 | 0.02563 |
|    | C | 0.02145 | −0.02398 | 0.03114 |
|    | F | 0.02134 | −0.02395 | 0.03115 |
|    | G | 0.01857 | −0.01925 | 0.02542 |
|    | H | 0.02148 | −0.02406 | 0.03118 |
| 21 | A | 0.02128 | −0.02388 | 0.03112 |
|    | B | 0.01896 | −0.01979 | 0.02602 |
|    | C | 0.02137 | −0.02387 | 0.03108 |
|    | F | 0.02132 | −0.02394 | 0.03115 |
|    | G | 0.01902 | −0.01988 | 0.02610 |
|    | H | 0.02139 | −0.02395 | 0.03114 |

Table S2. Angles Between the Ring Planes in Sennidin Conformers – Water,  $\sigma=0.001$  [deg.].

| Compound   | Conformer | Plane/angle [deg.] |        |
|------------|-----------|--------------------|--------|
|            |           | A–C                | F–H    |
| Sennidin A | 1         | 18.367             | 18.358 |
|            | 2         | 22.116             | 20.003 |

|            |    |        |        |
|------------|----|--------|--------|
| Sennidin B | 3  | 12.904 | 12.910 |
|            | 4  | 19.249 | 19.245 |
|            | 5  | 20.339 | 21.971 |
|            | 6  | 26.226 | 26.221 |
|            | 7  | 16.741 | 17.930 |
|            | 8  | 16.255 | 17.577 |
| Sennidin C | 9  | 12.679 | 19.451 |
|            | 10 | 18.510 | 17.327 |
|            | 11 | 18.414 | 17.548 |
|            | 12 | 22.902 | 27.256 |
|            | 13 | 15.032 | 13.049 |
|            | 14 | 15.869 | 16.824 |
| Sennidin D | 15 | 23.315 | 27.079 |
|            | 16 | 25.734 | 24.315 |
|            | 17 | 19.435 | 15.321 |
|            | 18 | 17.049 | 18.180 |
|            | 19 | 21.136 | 14.912 |
|            | 20 | 19.605 | 15.500 |
|            | 21 | 24.575 | 24.725 |

**Table S3.** Angles Between the Ring Planes in Sennidin Conformers – Methanol,  $\sigma=0.001$  [deg.].

| Compound   | Conformer | Plane/angle [deg.] |        |
|------------|-----------|--------------------|--------|
|            |           | A–C                | F–H    |
| Sennidin A | 1         | 18.330             | 18.321 |
|            | 2         | 22.135             | 19.997 |
|            | 3         | 12.867             | 12.868 |
|            | 4         | 19.287             | 19.281 |
|            | 5         | 20.327             | 22.085 |
|            | 6         | 26.106             | 26.106 |
| Sennidin B | 7         | 16.849             | 17.976 |
|            | 8         | 16.192             | 17.523 |
|            | 9         | 12.623             | 19.440 |
|            | 10        | 18.580             | 17.305 |
| Sennidin C | 11        | 18.379             | 17.512 |
|            | 12        | 22.911             | 27.215 |
|            | 13        | 14.943             | 12.917 |
|            | 14        | 15.901             | 16.808 |
|            | 15        | 23.331             | 27.076 |
|            | 16        | 25.722             | 24.286 |
| Sennidin D | 17        | 19.430             | 15.294 |
|            | 18        | 17.027             | 18.159 |
|            | 19        | 21.119             | 14.918 |
|            | 20        | 19.566             | 15.541 |
|            | 21        | 24.551             | 24.761 |

**Table S4.** Angles Between the Ring Planes in Sennidin Conformers. “A” – unsubstituted double anthrone in crystal and “B” – optimized double-anthrone.  $\sigma=0.001$  [deg.],  $\sigma=0.0001$  [Å],  $\sigma=0.001$  [deg.].

| Compound   | Structure | Hydrogen bond                        | H...O<br>[Å]  | O...O<br>[Å]  | OHO<br>[deg.]  |
|------------|-----------|--------------------------------------|---------------|---------------|----------------|
| sennidin A | 1         | C(A)-O-H...O=C(B)                    | 1.7142        | 2.5852        | 145.430        |
|            |           | C(C)-O-H...O=C(B)                    | 1.7060        | 2.5813        | 145.897        |
|            |           | C(F)-O-H...O=C(G)                    | 1.7142        | 2.5852        | 145.430        |
|            |           | C(H)-O-H...O=C(G)                    | 1.7061        | 2.5813        | 145.897        |
|            | 2         | C(A)-O-H...O=C(B)                    | 1.7266        | 2.5969        | 145.362        |
|            |           | C(C)-O-H...O=C(B)                    | 1.7294        | 2.6000        | 145.338        |
|            |           | C(F)-O-H...O=C(G)                    | 1.7272        | 2.5964        | 145.214        |
|            |           | C(H)-O-H...O=C(G)                    | 1.7311        | 2.6001        | 145.155        |
|            |           | <b>C(C)-C(O)-OH...O(H)-C(O)-C(H)</b> | <b>2.0086</b> | <b>2.9479</b> | <b>161.947</b> |
|            |           | C(A)-O-H...O=C(B)                    | 1.6827        | 2.5682        | 146.877        |
|            | 3         | C(C)-O-H...O=C(B)                    | 1.7273        | 2.5958        | 145.140        |
|            |           | C(F)-O-H...O=C(G)                    | 1.6826        | 2.5681        | 146.880        |
|            |           | C(H)-O-H...O=C(G)                    | 1.7273        | 2.5958        | 145.135        |
|            |           | <b>C(C)-C(O)-OH...O(H)-C(F)</b>      | <b>2.1723</b> | <b>3.0426</b> | <b>148.385</b> |
|            |           | <b>C(H)-C(O)-OH...O(H)-C(A)</b>      | <b>2.1727</b> | <b>3.0427</b> | <b>148.347</b> |
|            |           | C(A)-O-H...O=C(B)                    | 1.7691        | 2.6223        | 143.635        |
|            | 4         | C(C)-O-H...O=C(B)                    | 1.7303        | 2.5972        | 145.052        |
|            |           | C(F)-O-H...O=C(G)                    | 1.7691        | 2.6223        | 143.637        |
|            |           | C(H)-O-H...O=C(G)                    | 1.7303        | 2.5971        | 145.049        |
|            |           | C(C)-C(O)-OH...O=C(G)                | 1.8972        | 2.8674        | 172.762        |
|            |           | C(H)-C(O)-OH...O=C(B)                | 1.8976        | 2.8678        | 172.761        |
|            | 5         | C(A)-O-H...O=C(B)                    | 1.7315        | 2.5989        | 145.015        |
|            |           | C(C)-O-H...O=C(B)                    | 1.7275        | 2.5971        | 145.167        |
|            |           | C(F)-O-H...O=C(G)                    | 1.7256        | 2.5966        | 145.457        |
|            |           | C(H)-O-H...O=C(G)                    | 1.7311        | 2.6021        | 145.479        |
|            |           | <b>C(H)-C(O)-OH...O=C(OH)C(C)</b>    | <b>1.8381</b> | <b>2.8053</b> | <b>168.771</b> |
|            |           | C(A)-O-H...O=C(B)                    | 1.7362        | 2.6026        | 144.925        |
|            | 6         | C(C)-O-H...O=C(B)                    | 1.7288        | 2.5982        | 145.171        |
|            |           | C(F)-O-H...O=C(G)                    | 1.7362        | 2.6026        | 144.926        |
|            |           | C(H)-O-H...O=C(G)                    | 1.7288        | 2.5982        | 145.171        |
| sennidin B | 7         | C(A)-O-H...O=C(B)                    | 1.7096        | 2.5841        | 145.868        |
|            |           | C(C)-O-H...O=C(B)                    | 1.7142        | 2.5856        | 145.446        |
|            |           | C(F)-O-H...O=C(G)                    | 1.7135        | 2.5850        | 145.494        |
|            |           | C(H)-O-H...O=C(G)                    | 1.7068        | 2.5818        | 145.919        |
|            | 8         | C(A)-O-H...O=C(B)                    | 1.7071        | 2.5818        | 145.872        |
|            |           | C(C)-O-H...O=C(B)                    | 1.7100        | 2.5820        | 145.528        |
|            |           | C(F)-O-H...O=C(G)                    | 1.7149        | 2.5854        | 145.347        |
|            |           | C(H)-O-H...O=C(G)                    | 1.7074        | 2.5821        | 145.806        |
|            | 9         | C(A)-O-H...O=C(B)                    | 1.7085        | 2.5829        | 145.844        |
|            |           | C(C)-O-H...O=C(B)                    | 1.7022        | 2.5778        | 145.823        |
|            |           | C(F)-O-H...O=C(G)                    | 1.7214        | 2.5930        | 145.734        |
|            |           | C(H)-O-H...O=C(G)                    | 1.7527        | 2.6128        | 144.442        |
|            | 10        | C(A)-O-H...O=C(B)                    | 1.7157        | 2.5884        | 145.649        |
|            |           | C(C)-O-H...O=C(B)                    | 1.7227        | 2.5917        | 145.187        |
|            |           | C(F)-O-H...O=C(G)                    | 1.7236        | 2.5903        | 144.921        |
|            |           | C(H)-O-H...O=C(G)                    | 1.7062        | 2.5791        | 145.508        |
| sennidin C | 11        | C(A)-O-H...O=C(B)                    | 1.7150        | 2.5859        | 145.440        |
|            |           | C(C)-O-H...O=C(B)                    | 1.7036        | 2.5801        | 146.018        |
|            |           | C(F)-O-H...O=C(G)                    | 1.7043        | 2.5798        | 145.920        |

|              |    |                                                     |               |               |                |
|--------------|----|-----------------------------------------------------|---------------|---------------|----------------|
|              |    | C(H)-O-H...O=C(G)                                   | 1.7050        | 2.5831        | 146.300        |
|              |    | C(A)-O-H...O=C(B)                                   | 1.7268        | 2.5970        | 145.393        |
|              |    | C(C)-O-H...O=C(B)                                   | 1.7232        | 2.5946        | 145.449        |
|              | 12 | C(F)-O-H...O=C(G)                                   | 1.7225        | 2.5962        | 145.766        |
|              |    | C(H)-O-H...O=C(G)                                   | 1.7265        | 2.5988        | 145.599        |
|              |    | <b>C(H)-C(H<sub>2</sub>)-O-H...O(H)-C(O)-C(C)</b>   | <b>2.2492</b> | <b>3.2019</b> | <b>169.144</b> |
|              |    | C(A)-O-H...O=C(B)                                   | 1.6913        | 2.5749        | 146.636        |
|              |    | C(C)-O-H...O=C(B)                                   | 1.7371        | 2.6041        | 145.005        |
|              | 13 | C(F)-O-H...O=C(G)                                   | 1.6578        | 2.5514        | 147.698        |
|              |    | C(H)-O-H...O=C(G)                                   | 1.7269        | 2.5954        | 145.280        |
|              |    | <b>C(C)-C(O)-O-H...O(H)-C(F)</b>                    | <b>2.0939</b> | <b>2.9798</b> | <b>150.585</b> |
|              |    | <b>C(H)-C(H<sub>2</sub>)-O-H...O(H)-C(A)</b>        | <b>2.1529</b> | <b>3.1070</b> | <b>168.394</b> |
|              |    | C(A)-O-H...O=C(B)                                   | 1.7316        | 2.5982        | 145.145        |
|              |    | C(C)-O-H...O=C(B)                                   | 1.7207        | 2.5915        | 145.507        |
|              | 14 | C(F)-O-H...O=C(G)                                   | 1.7521        | 2.6126        | 144.518        |
|              |    | C(H)-O-H...O=C(G)                                   | 1.7212        | 2.5929        | 145.794        |
|              |    | <b>C(C)-C(O)-O-H...O=C(G)</b>                       | <b>2.0046</b> | <b>2.9108</b> | <b>153.912</b> |
|              |    | <b>C(H)-C(H<sub>2</sub>)-O-H...O=C(B)</b>           | <b>2.1301</b> | <b>3.0741</b> | <b>164.956</b> |
|              |    | C(A)-O-H...O=C(B)                                   | 1.7240        | 2.5962        | 145.633        |
|              |    | C(C)-O-H...O=C(B)                                   | 1.7221        | 2.5961        | 145.804        |
|              | 15 | C(F)-O-H...O=C(G)                                   | 1.7268        | 2.5981        | 145.495        |
|              |    | C(H)-O-H...O=C(G)                                   | 1.7268        | 2.5976        | 145.357        |
|              |    | <b>C(C)-C(O)-O-H...O=C(H)-C(H<sub>2</sub>)-C(H)</b> | <b>1.8108</b> | <b>2.7717</b> | <b>165.578</b> |
|              |    | C(A)-O-H...O=C(B)                                   | 1.7315        | 2.5997        | 145.130        |
|              | 16 | C(C)-O-H...O=C(B)                                   | 1.7269        | 2.5968        | 145.244        |
|              |    | C(F)-O-H...O=C(G)                                   | 1.7281        | 2.5987        | 145.411        |
|              |    | C(H)-O-H...O=C(G)                                   | 1.7276        | 2.6004        | 145.617        |
| sennidin D   | 17 | C(A)-O-H...O=C(B)                                   | 1.7156        | 2.5887        | 145.805        |
|              |    | C(C)-O-H...O=C(B)                                   | 1.7478        | 2.6091        | 144.620        |
|              |    | C(F)-O-H...O=C(G)                                   | 1.7001        | 2.5780        | 146.235        |
|              |    | C(H)-O-H...O=C(G)                                   | 1.6976        | 2.5748        | 146.066        |
|              |    | <b>C(H)-C(H<sub>2</sub>)-O-H...O=C(B)</b>           | <b>2.1931</b> | <b>3.0922</b> | <b>154.333</b> |
|              |    | C(A)-O-H...O=C(B)                                   | 1.7291        | 2.5941        | 144.766        |
|              |    | C(C)-O-H...O=C(B)                                   | 1.6687        | 2.5577        | 147.168        |
|              | 18 | C(F)-O-H...O=C(G)                                   | 1.7074        | 2.5844        | 146.132        |
|              |    | C(H)-O-H...O=C(G)                                   | 1.7271        | 2.5982        | 145.578        |
|              |    | <b>C(H)-C(H<sub>2</sub>)-O-H...O(H)-C(C)</b>        | <b>2.1320</b> | <b>3.0885</b> | <b>169.722</b> |
|              |    | C(A)-O-H...O=C(B)                                   | 1.7219        | 2.5935        | 145.525        |
|              |    | C(C)-O-H...O=C(B)                                   | 1.7344        | 2.6026        | 145.142        |
|              | 19 | C(F)-O-H...O=C(G)                                   | 1.7095        | 2.5833        | 145.719        |
|              |    | C(H)-O-H...O=C(G)                                   | 1.7007        | 2.5782        | 146.191        |
|              |    | <b>C(H)-C(H<sub>2</sub>)-O-H...O=C(OH)-C(C)</b>     | <b>2.0545</b> | <b>3.0061</b> | <b>166.977</b> |
|              |    | C(A)-O-H...O=C(B)                                   | 1.7169        | 2.5896        | 145.628        |
|              | 20 | C(C)-O-H...O=C(B)                                   | 1.7314        | 2.5990        | 145.068        |
|              |    | C(F)-O-H...O=C(G)                                   | 1.7195        | 2.5884        | 145.166        |
|              |    | C(H)-O-H...O=C(G)                                   | 1.6986        | 2.5755        | 145.955        |
|              |    | C(A)-O-H...O=C(B)                                   | 1.7298        | 2.5990        | 145.252        |
|              | 21 | C(C)-O-H...O=C(B)                                   | 1.7262        | 2.5968        | 145.383        |
|              |    | C(F)-O-H...O=C(G)                                   | 1.7239        | 2.5967        | 145.690        |
|              |    | C(H)-O-H...O=C(G)                                   | 1.7263        | 2.5998        | 145.758        |
| A (Figure 5) | –  | C(A)-O-H...O=C(B)                                   | 1.6862        | 2.5831        | 151.734        |
|              |    | C(C)-O-H...O=C(B)                                   | 1.7383        | 2.5646        | 146.429        |
|              |    | C(F)-O-H...O=C(G)                                   | 1.7383        | 2.5646        | 146.429        |
|              |    | C(H)-O-H...O=C(G)                                   | 1.6862        | 2.5831        | 151.734        |

|              |   |                   |        |        |         |
|--------------|---|-------------------|--------|--------|---------|
| B (Figure 5) | – | C(A)–O–H...O=C(B) | 1.7001 | 2.5783 | 146.268 |
|              |   | C(C)–O–H...O=C(B) | 1.7077 | 2.5814 | 145.740 |
|              |   | C(F)–O–H...O=C(G) | 1.7077 | 2.5815 | 145.737 |
|              |   | C(H)–O–H...O=C(G) | 1.7002 | 2.5784 | 146.266 |

**Table S5.** Hydrogen Bonds in Sennidin Conformers. PCM optimization in Water,  $\sigma=0.0001$  [Å],  $\sigma=0.001$  [deg.].

| Compound   | Conformer | Hydrogen bond                        | H...O<br>[Å]  | O...O<br>[Å]  | OHO<br>[deg.]  |
|------------|-----------|--------------------------------------|---------------|---------------|----------------|
| sennidin A | 1         | C(A)–O–H...O=C(B)                    | 1.7035        | 2.5805        | 146.115        |
|            |           | C(C)–O–H...O=C(B)                    | 1.7030        | 2.5810        | 146.223        |
|            |           | C(F)–O–H...O=C(G)                    | 1.7036        | 2.5806        | 146.117        |
|            |           | C(H)–O–H...O=C(G)                    | 1.7030        | 2.5810        | 146.224        |
|            | 2         | C(A)–O–H...O=C(B)                    | 1.7206        | 2.5947        | 145.845        |
|            |           | C(C)–O–H...O=C(B)                    | 1.7142        | 2.5916        | 146.107        |
|            |           | C(F)–O–H...O=C(G)                    | 1.7182        | 2.5925        | 145.849        |
|            |           | C(H)–O–H...O=C(G)                    | 1.7150        | 2.5918        | 146.053        |
|            |           | <b>C(C)–C(O)–OH...O(H)–C(O)–C(H)</b> | <b>1.9498</b> | <b>2.8931</b> | <b>161.954</b> |
|            | 3         | C(A)–O–H...O=C(B)                    | 1.6904        | 2.5734        | 146.576        |
|            |           | C(C)–O–H...O=C(B)                    | 1.7124        | 2.5877        | 145.878        |
|            |           | C(F)–O–H...O=C(G)                    | 1.6908        | 2.5738        | 146.571        |
|            |           | C(H)–O–H...O=C(G)                    | 1.7124        | 2.5877        | 145.875        |
|            |           | <b>C(C)–C(O)–OH...O(H)–C(F)</b>      | <b>2.1446</b> | <b>3.0113</b> | <b>147.422</b> |
|            |           | <b>C(H)–C(O)–OH...O(H)–C(A)</b>      | <b>2.1445</b> | <b>3.0115</b> | <b>147.461</b> |
|            | 4         | C(A)–O–H...O=C(B)                    | 1.7626        | 2.6202        | 144.157        |
|            |           | C(C)–O–H...O=C(B)                    | 1.7186        | 2.5903        | 145.487        |
|            |           | C(F)–O–H...O=C(G)                    | 1.7627        | 2.6204        | 144.155        |
|            |           | C(H)–O–H...O=C(G)                    | 1.7186        | 2.5904        | 145.487        |
|            |           | <b>C(C)–C(O)–OH...O=C(G)</b>         | <b>1.8451</b> | <b>2.8208</b> | <b>173.359</b> |
|            |           | <b>C(H)–C(O)–OH...O=C(B)</b>         | <b>1.8453</b> | <b>2.8210</b> | <b>173.351</b> |
|            | 5         | C(A)–O–H...O=C(B)                    | 1.7213        | 2.5945        | 145.731        |
|            |           | C(C)–O–H...O=C(B)                    | 1.7133        | 2.5904        | 146.058        |
|            |           | C(F)–O–H...O=C(G)                    | 1.7197        | 2.5942        | 145.887        |
|            |           | C(H)–O–H...O=C(G)                    | 1.7145        | 2.5919        | 145.123        |
|            |           | <b>C(H)–C(O)–OH...O=C(OH)C(C)</b>    | <b>1.7680</b> | <b>2.7456</b> | <b>170.459</b> |
|            | 6         | C(A)–O–H...O=C(B)                    | 1.7267        | 2.5984        | 145.561        |
|            |           | C(C)–O–H...O=C(B)                    | 1.7170        | 2.5922        | 145.815        |
|            |           | C(F)–O–H...O=C(G)                    | 1.7267        | 2.5985        | 145.562        |
|            |           | C(H)–O–H...O=C(G)                    | 1.7170        | 2.5922        | 145.816        |
| sennidin B | 7         | C(A)–O–H...O=C(B)                    | 1.7070        | 2.5840        | 146.198        |
|            |           | C(C)–O–H...O=C(B)                    | 1.6989        | 2.5771        | 146.175        |
|            |           | C(F)–O–H...O=C(G)                    | 1.7051        | 2.5817        | 146.077        |
|            |           | C(H)–O–H...O=C(G)                    | 1.7016        | 2.5799        | 146.247        |
|            | 8         | C(A)–O–H...O=C(B)                    | 1.7064        | 2.5835        | 146.201        |
|            |           | C(C)–O–H...O=C(B)                    | 1.6987        | 2.5769        | 146.184        |
|            |           | C(F)–O–H...O=C(G)                    | 1.7040        | 2.5808        | 146.093        |
|            |           | C(H)–O–H...O=C(G)                    | 1.7012        | 2.5795        | 146.251        |
|            | 9         | C(A)–O–H...O=C(B)                    | 1.7052        | 2.5824        | 146.211        |
|            |           | C(C)–O–H...O=C(B)                    | 1.6871        | 2.5691        | 146.491        |
|            |           | C(F)–O–H...O=C(G)                    | 1.7195        | 2.5922        | 145.717        |
|            |           | C(H)–O–H...O=C(G)                    | 1.7413        | 2.6075        | 145.083        |
|            | 10        | C(A)–O–H...O=C(B)                    | 1.7131        | 2.5881        | 145.975        |

|            |    |                                                     |               |               |                |
|------------|----|-----------------------------------------------------|---------------|---------------|----------------|
| sennidin C | 11 | C(C)-O-H...O=C(B)                                   | 1.7039        | 2.5808        | 146.003        |
|            |    | C(F)-O-H...O=C(G)                                   | 1.7099        | 2.5840        | 145.797        |
|            |    | C(H)-O-H...O=C(G)                                   | 1.7005        | 2.5782        | 146.118        |
|            |    | C(A)-O-H...O=C(B)                                   | 1.7045        | 2.5814        | 146.127        |
|            |    | C(C)-O-H...O=C(B)                                   | 1.7017        | 2.5803        | 146.293        |
|            |    | C(F)-O-H...O=C(G)                                   | 1.6908        | 2.5735        | 146.761        |
|            | 12 | C(H)-O-H...O=C(G)                                   | 1.6986        | 2.5808        | 146.793        |
|            |    | C(A)-O-H...O=C(B)                                   | 1.7195        | 2.5940        | 145.894        |
|            |    | C(C)-O-H...O=C(B)                                   | 1.7130        | 2.5898        | 146.080        |
|            |    | C(F)-O-H...O=C(G)                                   | 1.7147        | 2.5929        | 146.332        |
|            |    | C(H)-O-H...O=C(G)                                   | 1.7157        | 2.5939        | 146.288        |
|            |    | <b>C(H)-C(H<sub>2</sub>)-O-H...O(H)-C(O)-C(C)</b>   | <b>2.1544</b> | <b>3.1183</b> | <b>175.022</b> |
|            | 13 | C(A)-O-H...O=C(B)                                   | 1.6947        | 2.5784        | 146.757        |
|            |    | C(C)-O-H...O=C(B)                                   | 1.7165        | 2.5922        | 145.954        |
|            |    | C(F)-O-H...O=C(G)                                   | 1.6658        | 2.5576        | 147.475        |
|            |    | C(H)-O-H...O=C(G)                                   | 1.7109        | 2.5873        | 146.172        |
|            |    | <b>C(C)-C(O)-O-H...O(H)-C(F)</b>                    | <b>2.0501</b> | <b>2.9476</b> | <b>152.042</b> |
|            |    | <b>C(H)-C(H<sub>2</sub>)-O-H...O(H)-C(A)</b>        | <b>2.1178</b> | <b>3.0801</b> | <b>171.959</b> |
|            | 14 | C(A)-O-H...O=C(B)                                   | 1.7228        | 2.5934        | 145.572        |
|            |    | C(C)-O-H...O=C(B)                                   | 1.6983        | 2.5754        | 146.078        |
|            |    | C(F)-O-H...O=C(G)                                   | 1.7621        | 2.6193        | 144.115        |
|            |    | C(H)-O-H...O=C(G)                                   | 1.7206        | 2.5943        | 145.886        |
|            |    | <b>C(C)-C(O)-O-H...O=C(G)</b>                       | <b>1.8372</b> | <b>2.8131</b> | <b>172.670</b> |
|            |    | <b>C(H)-C(H<sub>2</sub>)-O-H...O=C(B)</b>           | <b>2.0332</b> | <b>2.9941</b> | <b>171.066</b> |
|            | 15 | C(A)-O-H...O=C(B)                                   | 1.7171        | 2.5930        | 146.063        |
|            |    | C(C)-O-H...O=C(B)                                   | 1.7121        | 2.5906        | 146.221        |
|            |    | C(F)-O-H...O=C(G)                                   | 1.7163        | 2.5935        | 146.214        |
|            |    | C(H)-O-H...O=C(G)                                   | 1.7163        | 2.5936        | 146.159        |
|            |    | <b>C(C)-C(O)-O-H...O=C(H)-C(H<sub>2</sub>)-C(H)</b> | <b>1.6937</b> | <b>2.6806</b> | <b>171.045</b> |
|            |    | C(A)-O-H...O=C(B)                                   | 1.7243        | 2.5969        | 145.672        |
| sennidin D | 16 | C(C)-O-H...O=C(B)                                   | 1.7146        | 2.5908        | 145.959        |
|            |    | C(F)-O-H...O=C(G)                                   | 1.7169        | 2.5935        | 146.138        |
|            |    | C(H)-O-H...O=C(G)                                   | 1.7163        | 2.5949        | 146.310        |
|            |    | C(A)-O-H...O=C(B)                                   | 1.7067        | 2.5835        | 146.124        |
|            |    | C(C)-O-H...O=C(B)                                   | 1.7356        | 2.6020        | 145.084        |
|            |    | C(F)-O-H...O=C(G)                                   | 1.6932        | 2.5750        | 146.719        |
|            | 17 | C(H)-O-H...O=C(G)                                   | 1.6847        | 2.5679        | 146.721        |
|            |    | <b>C(H)-C(H<sub>2</sub>)-O-H...O=C(B)</b>           | <b>2.2266</b> | <b>3.0987</b> | <b>149.515</b> |
|            |    | C(A)-O-H...O=C(B)                                   | 1.7138        | 2.5870        | 145.722        |
|            |    | C(C)-O-H...O=C(B)                                   | 1.6747        | 2.5625        | 147.082        |
|            |    | C(F)-O-H...O=C(G)                                   | 1.7024        | 2.5825        | 146.562        |
|            |    | C(H)-O-H...O=C(G)                                   | 1.7075        | 2.5866        | 146.461        |
|            | 18 | <b>C(H)-C(H<sub>2</sub>)-O-H...O(H)-C(C)</b>        | <b>2.1225</b> | <b>3.0825</b> | <b>171.137</b> |
|            |    | C(A)-O-H...O=C(B)                                   | 1.7162        | 2.5920        | 146.073        |
|            |    | C(C)-O-H...O=C(B)                                   | 1.7197        | 2.5954        | 145.999        |
|            |    | C(F)-O-H...O=C(G)                                   | 1.6989        | 2.5792        | 146.514        |
|            |    | C(H)-O-H...O=C(G)                                   | 1.6929        | 2.5754        | 146.800        |
|            |    | <b>C(H)-C(H<sub>2</sub>)-O-H...O=C(OH)-C(C)</b>     | <b>1.9875</b> | <b>2.9494</b> | <b>170.848</b> |
|            | 19 | C(A)-O-H...O=C(B)                                   | 1.7144        | 2.5896        | 145.999        |
|            |    | C(C)-O-H...O=C(B)                                   | 1.7102        | 2.5861        | 145.949        |
|            |    | C(F)-O-H...O=C(G)                                   | 1.7001        | 2.5786        | 146.296        |
|            |    | C(H)-O-H...O=C(G)                                   | 1.6928        | 2.5747        | 146.636        |
|            |    | C(A)-O-H...O=C(B)                                   | 1.7231        | 2.5967        | 145.799        |
|            |    | C(C)-O-H...O=C(B)                                   | 1.7153        | 2.5915        | 145.992        |



|  |                   |        |        |         |
|--|-------------------|--------|--------|---------|
|  | C(F)-O-H...O=C(G) | 1.7100 | 2.5896 | 146.481 |
|  | C(H)-O-H...O=C(G) | 1.7137 | 2.5933 | 146.478 |

**Table S6.** Hydrogen Bonds in Sennidin Conformers. PCM optimization in Methanol,  $\sigma=0.0001$  [Å],  $\sigma=0.001$  [deg.].

| Compound   | Conformer | Hydrogen bond                        | H...O<br>[Å]  | O...O<br>[Å]  | OHO<br>[deg.]  |
|------------|-----------|--------------------------------------|---------------|---------------|----------------|
| sennidin A | 1         | C(A)-O-H...O=C(B)                    | 1.7040        | 2.5807        | 146.082        |
|            |           | C(C)-O-H...O=C(B)                    | 1.7029        | 2.5809        | 146.215        |
|            |           | C(F)-O-H...O=C(G)                    | 1.7040        | 2.5807        | 146.084        |
|            |           | C(H)-O-H...O=C(G)                    | 1.7030        | 2.5809        | 146.216        |
|            | 2         | C(A)-O-H...O=C(B)                    | 1.7209        | 2.5948        | 145.827        |
|            |           | C(C)-O-H...O=C(B)                    | 1.7148        | 2.5919        | 146.075        |
|            |           | C(F)-O-H...O=C(G)                    | 1.7186        | 2.5927        | 145.825        |
|            |           | C(H)-O-H...O=C(G)                    | 1.7156        | 2.5920        | 146.012        |
|            |           | <b>C(C)-C(O)-OH...O(H)-C(O)-C(H)</b> | <b>1.9499</b> | <b>2.8934</b> | <b>162.043</b> |
|            | 3         | C(A)-O-H...O=C(B)                    | 1.6903        | 2.5734        | 146.584        |
|            |           | C(C)-O-H...O=C(B)                    | 1.7131        | 2.5881        | 145.834        |
|            |           | C(F)-O-H...O=C(G)                    | 1.6902        | 2.5734        | 146.584        |
|            |           | C(H)-O-H...O=C(G)                    | 1.7131        | 2.5881        | 145.835        |
|            |           | <b>C(C)-C(O)-OH...O(H)-C(F)</b>      | <b>2.1420</b> | <b>3.0103</b> | <b>147.665</b> |
|            |           | <b>C(H)-C(O)-OH...O(H)-C(A)</b>      | <b>2.1420</b> | <b>3.0103</b> | <b>147.666</b> |
|            | 4         | C(A)-O-H...O=C(B)                    | 1.7635        | 2.6208        | 144.125        |
|            |           | C(C)-O-H...O=C(B)                    | 1.7191        | 2.5906        | 145.466        |
|            |           | C(F)-O-H...O=C(G)                    | 1.7634        | 2.6208        | 144.126        |
|            |           | C(H)-O-H...O=C(G)                    | 1.7190        | 2.5906        | 145.468        |
|            |           | <b>C(C)-C(O)-OH...O=C(G)</b>         | <b>1.8464</b> | <b>2.8219</b> | <b>173.336</b> |
|            |           | <b>C(H)-C(O)-OH...O=C(B)</b>         | <b>1.8462</b> | <b>2.8217</b> | <b>173.349</b> |
|            | 5         | C(A)-O-H...O=C(B)                    | 1.7217        | 2.5945        | 145.680        |
|            |           | C(C)-O-H...O=C(B)                    | 1.7142        | 2.5909        | 146.002        |
|            |           | C(F)-O-H...O=C(G)                    | 1.7201        | 2.5944        | 145.858        |
|            |           | C(H)-O-H...O=C(G)                    | 1.7156        | 2.5928        | 146.093        |
|            |           | <b>C(H)-C(O)-OH...O=C(OH)C(C)</b>    | <b>1.7692</b> | <b>2.7471</b> | <b>170.676</b> |
| sennidin B | 6         | C(A)-O-H...O=C(B)                    | 1.7270        | 2.5985        | 145.534        |
|            |           | C(C)-O-H...O=C(B)                    | 1.7172        | 2.5922        | 145.796        |
|            |           | C(F)-O-H...O=C(G)                    | 1.7270        | 2.5984        | 145.534        |
|            |           | C(H)-O-H...O=C(G)                    | 1.7172        | 2.5922        | 145.796        |
|            | 7         | C(A)-O-H...O=C(B)                    | 1.7071        | 2.5839        | 146.178        |
|            |           | C(C)-O-H...O=C(B)                    | 1.6999        | 2.5777        | 146.135        |
|            |           | C(F)-O-H...O=C(G)                    | 1.7058        | 2.5820        | 146.038        |
|            |           | C(H)-O-H...O=C(G)                    | 1.7020        | 2.5800        | 146.228        |
|            | 8         | C(A)-O-H...O=C(B)                    | 1.7063        | 2.5833        | 146.189        |
|            |           | C(C)-O-H...O=C(B)                    | 1.6993        | 2.5771        | 146.148        |
|            |           | C(F)-O-H...O=C(G)                    | 1.7045        | 2.5810        | 146.053        |
|            |           | C(H)-O-H...O=C(G)                    | 1.7013        | 2.5795        | 146.230        |
|            | 9         | C(A)-O-H...O=C(B)                    | 1.7055        | 2.5826        | 146.196        |
|            |           | C(C)-O-H...O=C(B)                    | 1.6878        | 2.5695        | 146.461        |
|            |           | C(F)-O-H...O=C(G)                    | 1.7196        | 2.5923        | 145.721        |
|            |           | C(H)-O-H...O=C(G)                    | 1.7424        | 2.6082        | 145.040        |
|            | 10        | C(A)-O-H...O=C(B)                    | 1.7133        | 2.5882        | 145.959        |
|            |           | C(C)-O-H...O=C(B)                    | 1.7047        | 2.5812        | 145.958        |
|            |           | C(F)-O-H...O=C(G)                    | 1.7107        | 2.5845        | 145.745        |
|            |           | C(H)-O-H...O=C(G)                    | 1.7006        | 2.5781        | 146.080        |

|            |    |                                                     |               |               |                |
|------------|----|-----------------------------------------------------|---------------|---------------|----------------|
| sennidin C | 11 | C(A)-O-H...O=C(B)                                   | 1.7049        | 2.5816        | 146.100        |
|            |    | C(C)-O-H...O=C(B)                                   | 1.7015        | 2.5802        | 146.296        |
|            |    | C(F)-O-H...O=C(G)                                   | 1.6914        | 2.5738        | 146.730        |
|            |    | C(H)-O-H...O=C(G)                                   | 1.6985        | 2.5807        | 146.789        |
|            | 12 | C(A)-O-H...O=C(B)                                   | 1.7200        | 2.5944        | 145.876        |
|            |    | C(C)-O-H...O=C(B)                                   | 1.7133        | 2.5899        | 146.052        |
|            |    | C(F)-O-H...O=C(G)                                   | 1.7150        | 2.5930        | 146.314        |
|            |    | C(H)-O-H...O=C(G)                                   | 1.7157        | 2.5937        | 146.269        |
|            |    | <b>C(H)-C(H<sub>2</sub>)-O-H...O(H)-C(O)-C(C)</b>   | <b>2.1580</b> | <b>3.1217</b> | <b>174.843</b> |
|            | 13 | C(A)-O-H...O=C(B)                                   | 1.6946        | 2.5783        | 146.743        |
|            |    | C(C)-O-H...O=C(B)                                   | 1.7170        | 2.5923        | 145.916        |
|            |    | C(F)-O-H...O=C(G)                                   | 1.6657        | 2.5574        | 147.477        |
|            |    | C(H)-O-H...O=C(G)                                   | 1.7113        | 2.5875        | 146.137        |
|            |    | <b>C(C)-C(O)-O-H...O(H)-C(F)</b>                    | <b>2.0605</b> | <b>2.9542</b> | <b>151.445</b> |
|            |    | <b>C(H)-C(H<sub>2</sub>)-O-H...O(H)-C(A)</b>        | <b>2.1192</b> | <b>3.0814</b> | <b>171.881</b> |
|            | 14 | C(A)-O-H...O=C(B)                                   | 1.7230        | 2.5934        | 145.549        |
|            |    | C(C)-O-H...O=C(B)                                   | 1.6995        | 2.5761        | 146.026        |
|            |    | C(F)-O-H...O=C(G)                                   | 1.7625        | 2.6195        | 144.083        |
|            |    | C(H)-O-H...O=C(G)                                   | 1.7212        | 2.5947        | 145.860        |
|            |    | <b>C(C)-C(O)-O-H...O=C(G)</b>                       | <b>1.8388</b> | <b>2.8146</b> | <b>172.717</b> |
|            |    | <b>C(H)-C(H<sub>2</sub>)-O-H...O=C(B)</b>           | <b>2.0325</b> | <b>2.9933</b> | <b>171.078</b> |
|            | 15 | C(A)-O-H...O=C(B)                                   | 1.7174        | 2.5932        | 146.051        |
|            |    | C(C)-O-H...O=C(B)                                   | 1.7130        | 2.5908        | 146.213        |
|            |    | C(F)-O-H...O=C(G)                                   | 1.7166        | 2.5936        | 146.189        |
|            |    | C(H)-O-H...O=C(G)                                   | 1.7169        | 2.5940        | 146.127        |
|            |    | <b>C(C)-C(O)-O-H...O=C(H)-C(H<sub>2</sub>)-C(H)</b> | <b>1.6976</b> | <b>2.6837</b> | <b>170.868</b> |
|            | 16 | C(A)-O-H...O=C(B)                                   | 1.7247        | 2.5971        | 145.649        |
|            |    | C(C)-O-H...O=C(B)                                   | 1.7151        | 2.5911        | 145.927        |
|            |    | C(F)-O-H...O=C(G)                                   | 1.7175        | 2.5938        | 146.112        |
|            |    | C(H)-O-H...O=C(G)                                   | 1.7167        | 2.5952        | 146.288        |
| sennidin D | 17 | C(A)-O-H...O=C(B)                                   | 1.7071        | 2.5838        | 146.116        |
|            |    | C(C)-O-H...O=C(B)                                   | 1.7363        | 2.6025        | 145.061        |
|            |    | C(F)-O-H...O=C(G)                                   | 1.6933        | 2.5750        | 146.704        |
|            |    | C(H)-O-H...O=C(G)                                   | 1.6853        | 2.5682        | 146.690        |
|            |    | <b>C(H)-C(H<sub>2</sub>)-O-H...O=C(B)</b>           | <b>2.2236</b> | <b>3.0967</b> | <b>149.681</b> |
|            | 18 | C(A)-O-H...O=C(B)                                   | 1.7147        | 2.5874        | 145.662        |
|            |    | C(C)-O-H...O=C(B)                                   | 1.6745        | 2.5624        | 147.075        |
|            |    | C(F)-O-H...O=C(G)                                   | 1.7025        | 2.5824        | 146.544        |
|            |    | C(H)-O-H...O=C(G)                                   | 1.7086        | 2.5873        | 146.421        |
|            |    | <b>C(H)-C(H<sub>2</sub>)-O-H...O(H)-C(C)</b>        | <b>2.1214</b> | <b>3.0818</b> | <b>171.312</b> |
|            | 19 | C(A)-O-H...O=C(B)                                   | 1.7166        | 2.5922        | 146.047        |
|            |    | C(C)-O-H...O=C(B)                                   | 1.7204        | 2.5957        | 145.956        |
|            |    | C(F)-O-H...O=C(G)                                   | 1.6994        | 2.5793        | 146.475        |
|            |    | C(H)-O-H...O=C(G)                                   | 1.6932        | 2.5755        | 146.769        |
|            |    | <b>C(H)-C(H<sub>2</sub>)-O-H...O=C(OH)-C(C)</b>     | <b>1.9889</b> | <b>2.9506</b> | <b>170.801</b> |
|            | 20 | C(A)-O-H...O=C(B)                                   | 1.7142        | 2.5893        | 145.986        |
|            |    | C(C)-O-H...O=C(B)                                   | 1.7108        | 2.5864        | 145.907        |
|            |    | C(F)-O-H...O=C(G)                                   | 1.7008        | 2.5789        | 146.243        |
|            |    | C(H)-O-H...O=C(G)                                   | 1.6931        | 2.5748        | 146.600        |
|            | 21 | C(A)-O-H...O=C(B)                                   | 1.7234        | 2.5968        | 145.772        |
|            |    | C(C)-O-H...O=C(B)                                   | 1.7159        | 2.5918        | 145.963        |
|            |    | C(F)-O-H...O=C(G)                                   | 1.7106        | 2.5900        | 146.452        |
|            |    | C(H)-O-H...O=C(G)                                   | 1.7142        | 2.5935        | 146.453        |

**Table S7.** The C–C Bond Length, BDE, AIE and SE Calculated for Sennidin Structures.

| Sennidine structure | R <sub>C–C</sub> [Å] | BDE [kcal·mol <sup>−1</sup> ] | AIE [kcal·mol <sup>−1</sup> ] | SE [kcal·mol <sup>−1</sup> ] |
|---------------------|----------------------|-------------------------------|-------------------------------|------------------------------|
| 1                   | 1.628                | −74.7                         | −26.9                         | 8.6                          |
| 2                   | 1.638                | −78.3                         | −31.5                         | 11.0                         |
| 3                   | 1.662                | −84.7                         | −34.4                         | 5.0                          |
| 4                   | 1.641                | −84.0                         | −27.6                         | 3.9                          |
| 5                   | 1.637                | −82.7                         | −32.1                         | 6.4                          |
| 6                   | 1.631                | −76.9                         | −32.8                         | 9.6                          |
| 7                   | 1.630                | −75.6                         | −27.7                         | 7.6                          |
| 8                   | 1.630                | −75.7                         | −27.4                         | 7.4                          |
| 9                   | 1.635                | −78.4                         | −28.3                         | 7.1                          |
| 10                  | 1.629                | −76.9                         | −27.6                         | 6.7                          |
| 11                  | 1.628                | −74.9                         | −27.4                         | 8.1                          |
| 12                  | 1.630                | −77.3                         | −32.1                         | 10.3                         |
| 13                  | 1.657                | −84.2                         | −34.7                         | 3.9                          |
| 14                  | 1.641                | −83.2                         | −29.5                         | 4.0                          |
| 15                  | 1.629                | −83.4                         | −31.7                         | 5.7                          |
| 16                  | 1.632                | −78.4                         | −32.8                         | 7.8                          |
| 17                  | 1.630                | −77.9                         | −25.6                         | 5.9                          |
| 18                  | 1.639                | −78.7                         | −30.6                         | 5.7                          |
| 19                  | 1.644                | −80.2                         | −28.4                         | 5.8                          |
| 20                  | 1.632                | −78.1                         | −28.2                         | 6.1                          |
| 21                  | 1.630                | −75.4                         | −32.3                         | 10.8                         |

**Table S8.** Orbital Transition Parameters for Sennidin Derivatives.

| Con-former | Energy [cm <sup>−1</sup> ] | Oscylator strength | Contribution of single orbital transition [%] | Orbital transition |
|------------|----------------------------|--------------------|-----------------------------------------------|--------------------|
| 1          | 23829.65                   | 0.0806             | 98.40                                         | 70a→70b            |
|            | 26002.45                   | 0.0053             | 98.1                                          | 69b→70b            |
|            | 27239.62                   | 0.0001             | 82.7                                          | 69a→70b            |
|            |                            |                    | 14.5                                          | 69b→71b            |
|            |                            |                    | 1.2                                           | 68b→71a            |
|            | 28522.66                   | 0.0106             | 92.7                                          | 70a→71a            |
|            |                            |                    | 3.4                                           | 69a→71b            |
|            |                            |                    | 2.4                                           | 69b→70b            |
|            | 29547.92                   | 0.0052             | 83.0                                          | 69b→71a            |
|            |                            |                    | 14.7                                          | 69a→70b            |
|            |                            |                    | 92.2                                          | 68b→70b            |
|            | 23454.59                   | 0.0512             | 3.3                                           | 70a→71a            |
|            |                            |                    | 1.9                                           | 69a→71a            |
|            |                            |                    | 92.4                                          | 69a→71a            |
|            | 25885.04                   | 0.0346             | 3.1                                           | 68b→70b            |
|            |                            |                    | 2.3                                           | 70a→71a            |
|            |                            |                    | 72.0                                          | 67b→70b            |
|            | 26304.24                   | 0.2111             | 16.5                                          | 66b→70b            |
|            |                            |                    | 5.2                                           | 66a→71a            |
|            |                            |                    | 2.2                                           | 68a→71a            |

|    |          |        |      |           |
|----|----------|--------|------|-----------|
| 7  | 29734.33 | 0.0062 | 1.3  | 67a→71a   |
|    |          |        | 90.9 | 68b→71a   |
|    |          |        | 2.5  | 68a→70b   |
|    |          |        | 2.0  | 66a→70b   |
|    |          |        | 1.2  | 66b→71a   |
|    | 30162.44 | 0.0174 | 33.1 | 66a→70b   |
|    |          |        | 18.2 | 66b→71a   |
|    |          |        | 17.1 | 67b→71a   |
|    | 23187.45 | 0.0441 | 86.1 | 139a→140a |
|    |          |        | 11.0 | 138a→140a |
|    |          |        | 1.1  | 137a→140a |
|    | 23788.92 | 0.0747 | 87.2 | 138a→140a |
|    |          |        | 11.1 | 139a→140a |
|    | 25348.96 | 0.0553 | 92.7 | 137a→140a |
|    |          |        | 2.1  | 139a→141a |
|    |          |        | 1.8  | 138a→141a |
|    | 26243.04 | 0.0616 | 85.5 | 139a→141a |
|    |          |        | 6.3  | 138a→141a |
|    |          |        | 2.7  | 136a→140a |
|    |          |        | 2.3  | 137a→141a |
|    | 26510.84 | 0.0401 | 1.3  | 137a→140a |
|    |          |        | 56.4 | 136a→140a |
|    |          |        | 29.9 | 138a→141a |
|    |          |        | 8.6  | 139a→141a |
|    |          |        | 2.5  | 137a→141a |
|    | 27028.05 | 0.0736 | 1.3  | 137a→140a |
|    |          |        | 58.8 | 138a→141a |
|    |          |        | 36.2 | 136a→140a |
|    | 28219.08 | 0.0144 | 1.3  | 137a→140a |
|    |          |        | 91.5 | 137a→141a |
|    |          |        | 2.9  | 136a→140a |
|    |          |        | 1.8  | 136a→141a |
|    | 29499.62 | 0.0004 | 1.0  | 139a→141a |
|    |          |        | 88.1 | 136a→141a |
|    |          |        | 3.5  | 134a→140a |
|    |          |        | 1.6  | 137a→141a |
|    |          |        | 1.6  | 135a→140a |
|    | 29689.09 | 0.0020 | 60.0 | 135a→140a |
|    |          |        | 21.6 | 132a→140a |
|    |          |        | 7.0  | 133a→141a |
|    |          |        | 2.0  | 134a→141a |
|    |          |        | 1.9  | 131a→140a |
|    |          |        | 1.6  | 131a→141a |
|    |          |        | 1.2  | 136a→141a |
|    |          |        | 1.0  | 128a→140a |
|    | 30071.40 | 0.0180 | 43.9 | 133a→140a |
|    |          |        | 19.3 | 134a→140a |
|    |          |        | 13.0 | 132a→141a |
|    |          |        | 7.8  | 131a→140a |
|    |          |        | 5.0  | 136a→141a |
|    |          |        | 2.8  | 135a→141a |
|    |          |        | 1.6  | 129a→140a |
|    |          |        | 1.6  | 131a→141a |
| 11 | 23490.87 | 0.0410 | 58.9 | 135a→137a |

|    |  |  |      |           |
|----|--|--|------|-----------|
| 17 |  |  | 39.3 | 136a→137a |
|    |  |  | 59.1 | 136a→137a |
|    |  |  | 39.7 | 135a→137a |
|    |  |  | 96.7 | 134a→137a |
|    |  |  | 97.0 | 136a→138a |
|    |  |  | 8.8  | 135a→138a |
|    |  |  | 1.5  | 133a→137a |
|    |  |  | 1.1  | 134a→138a |
|    |  |  | 70.5 | 133a→137a |
|    |  |  | 19.1 | 135a→138a |
|    |  |  | 6.4  | 136a→138a |
|    |  |  | 67.3 | 135a→138a |
|    |  |  | 24.8 | 133a→137a |
|    |  |  | 4.1  | 136a→138a |
|    |  |  | 88.4 | 134a→138a |
|    |  |  | 5.0  | 132a→137a |
|    |  |  | 1.6  | 133a→138a |
|    |  |  | 1.4  | 135a→138a |
|    |  |  | 70.7 | 132a→137a |
|    |  |  | 13.4 | 131a→137a |
|    |  |  | 5.4  | 128a→137a |
|    |  |  | 4.1  | 134a→138a |
|    |  |  | 1.5  | 127a→137a |
|    |  |  | 35.9 | 128a→137a |
|    |  |  | 17.2 | 131a→137a |
|    |  |  | 13.5 | 123a→137a |
|    |  |  | 2.9  | 127a→137a |
|    |  |  | 11.2 | 130a→137a |
|    |  |  | 1.2  | 128a→138a |
|    |  |  | 55.5 | 133a→138a |
|    |  |  | 24.5 | 131a→137a |
|    |  |  | 8.2  | 128a→137a |
|    |  |  | 4.8  | 127a→137a |
|    |  |  | 1.9  | 134a→138a |
|    |  |  | 97.6 | 136a→137a |
|    |  |  | 1.2  | 135a→137a |
|    |  |  | 96.6 | 135a→137a |
|    |  |  | 1.2  | 136a→137a |
|    |  |  | 96.5 | 134a→137a |
|    |  |  | 70.3 | 133a→137a |
|    |  |  | 24.9 | 136a→138a |
|    |  |  | 1.3  | 135a→137a |
|    |  |  | 58.4 | 136a→138a |
|    |  |  | 21.3 | 133a→137a |
|    |  |  | 16.8 | 135a→138a |
|    |  |  | 1.6  | 134a→138a |
|    |  |  | 80.9 | 135a→138a |
|    |  |  | 11.3 | 136a→138a |
|    |  |  | 5.0  | 133a→137a |
|    |  |  | 85.3 | 132a→137a |
|    |  |  | 8.4  | 134a→138a |
|    |  |  | 1.3  | 131a→137a |
|    |  |  | 80.6 | 134a→138a |
|    |  |  | 9.6  | 132a→137a |

|          |        |      |           |
|----------|--------|------|-----------|
| 31007.43 | 0.0039 | 6.0  | 133a→138a |
|          |        | 1.7  | 136a→138a |
|          |        | 69.7 | 133a→138a |
|          |        | 7.4  | 126a→137a |
|          |        | 6.4  | 131a→137a |
|          |        | 6.0  | 134a→138a |
|          |        | 2.4  | 128a→137a |
|          |        | 2.2  | 127a→137a |
|          |        | 1.2  | 125a→137a |
|          |        | 27.0 | 126a→137a |
| 31079.69 | 0.0238 | 20.6 | 133a→138a |
|          |        | 14.4 | 131a→137a |
|          |        | 9.5  | 128a→137a |
|          |        | 7.4  | 127a→137a |
|          |        | 5.6  | 130a→137a |
|          |        | 4.5  | 125a→137a |
|          |        | 3.8  | 129a→137a |
|          |        | 1.2  | 132a→137a |
|          |        | 1.2  | 134a→138a |
|          |        |      |           |

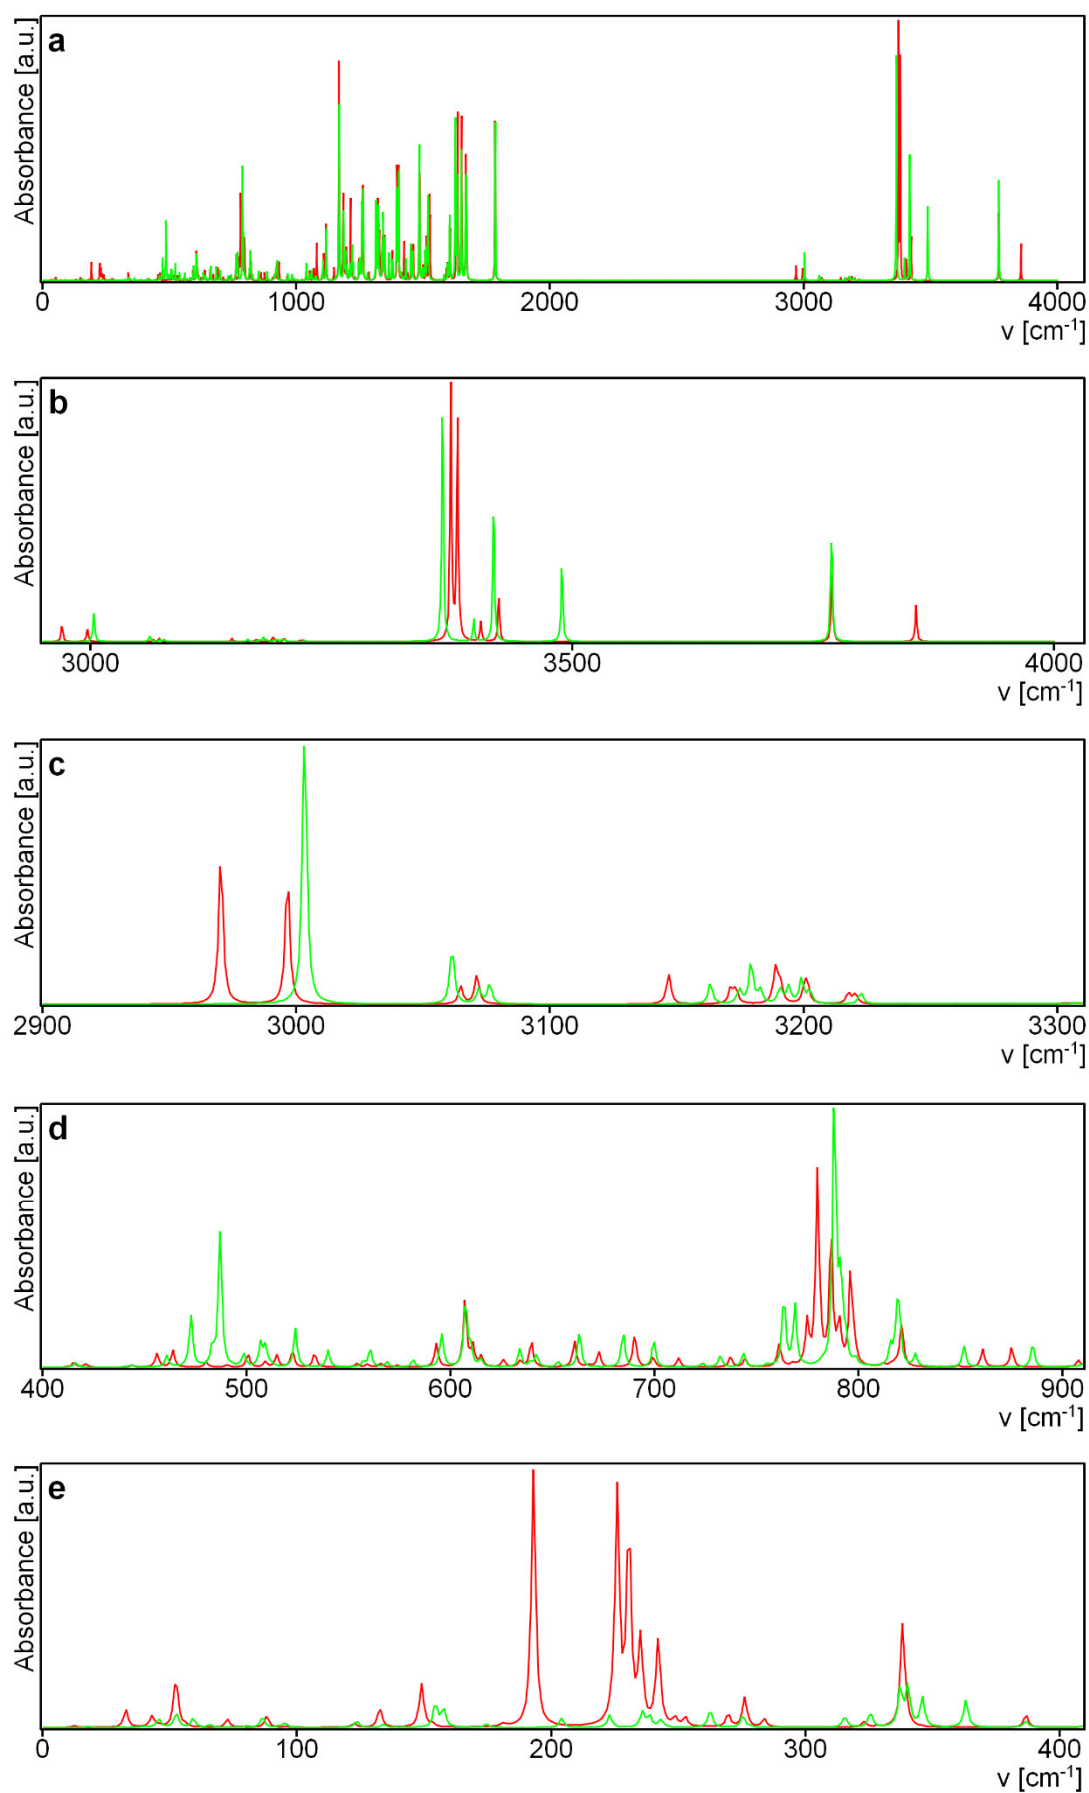

**Figure S1.** Theoretical IR Spectra for Sennidine C and Sennidine D. Structure 11 – Red, Structure 17 – Green.

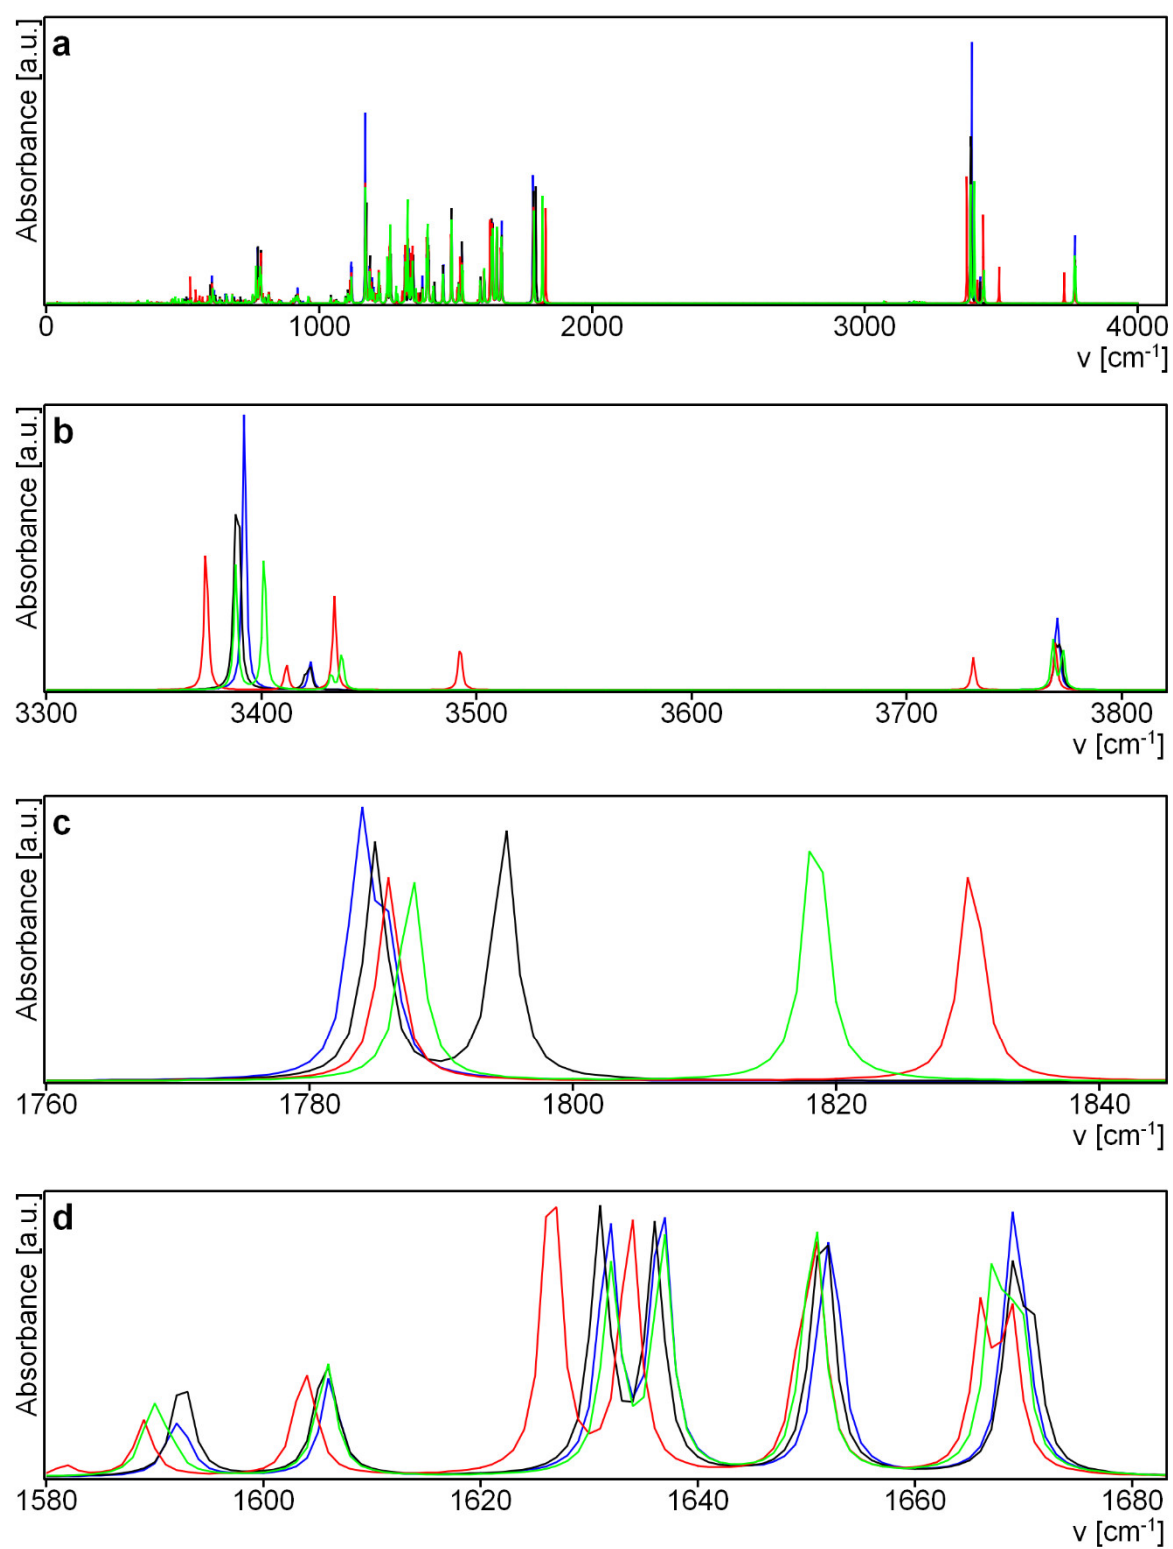

**Figure S2.** Theoretical IR Spectra for Sennidine B. Structure 7 – Blue, 8 – Black, 9 – Red, 10 – Green.



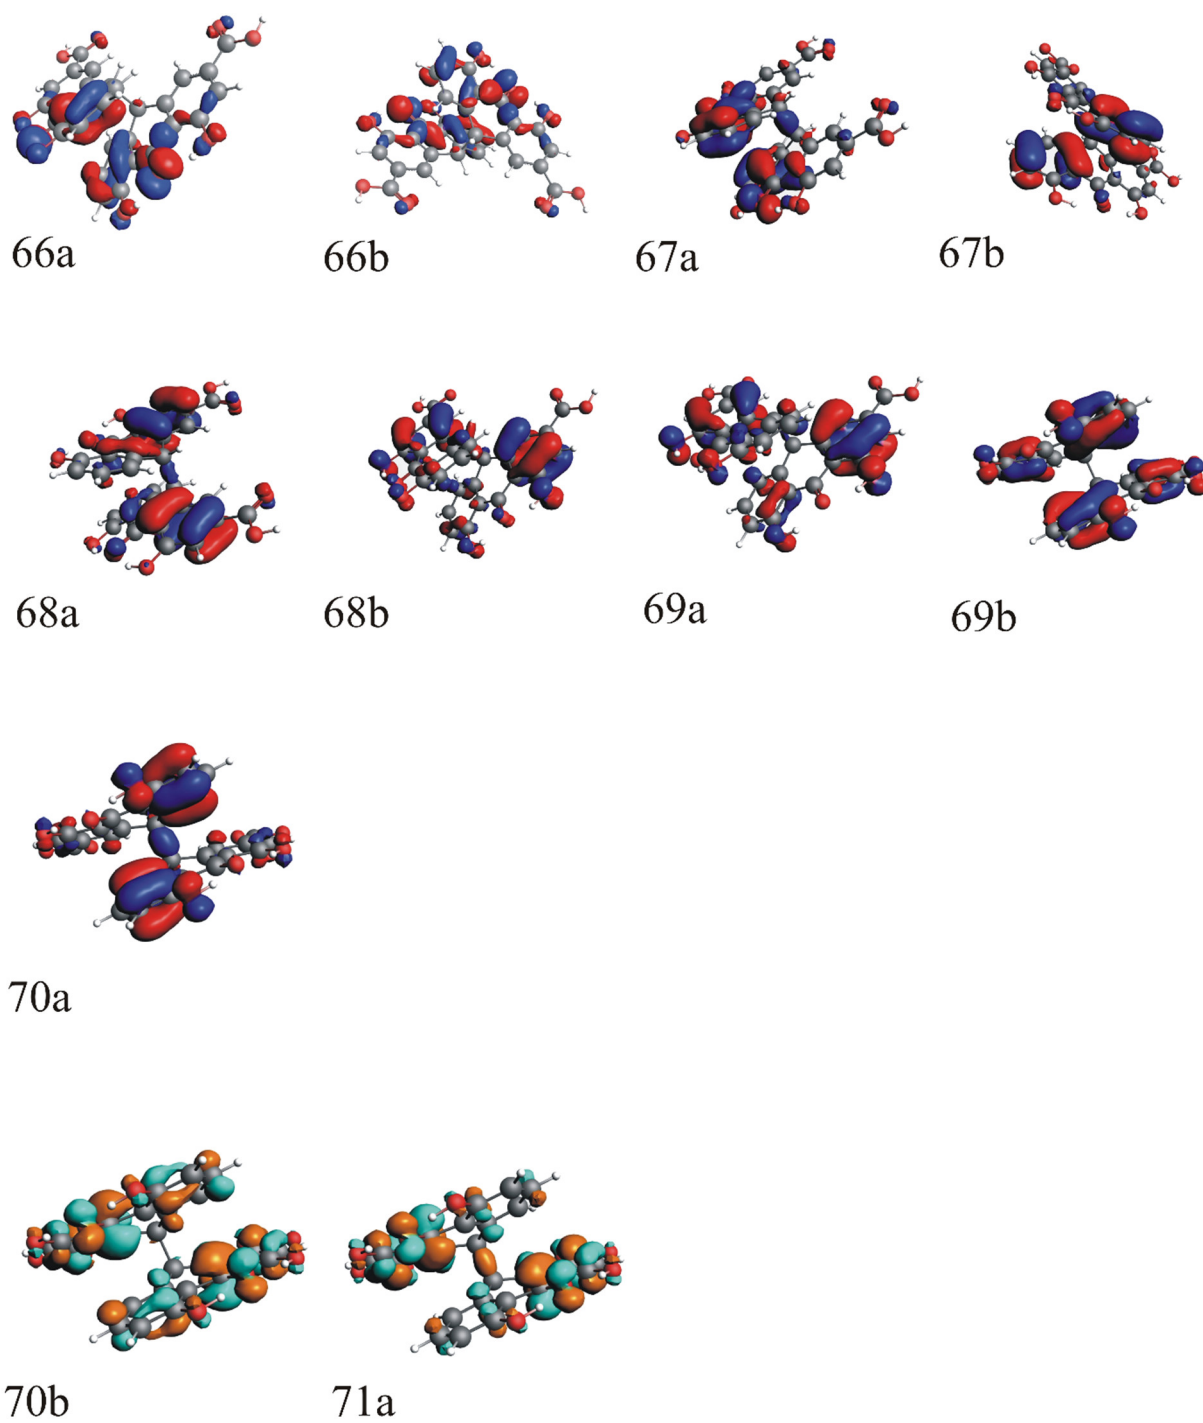

Figure S3. Molecular Orbitals for Sennidine A – Structure 1.

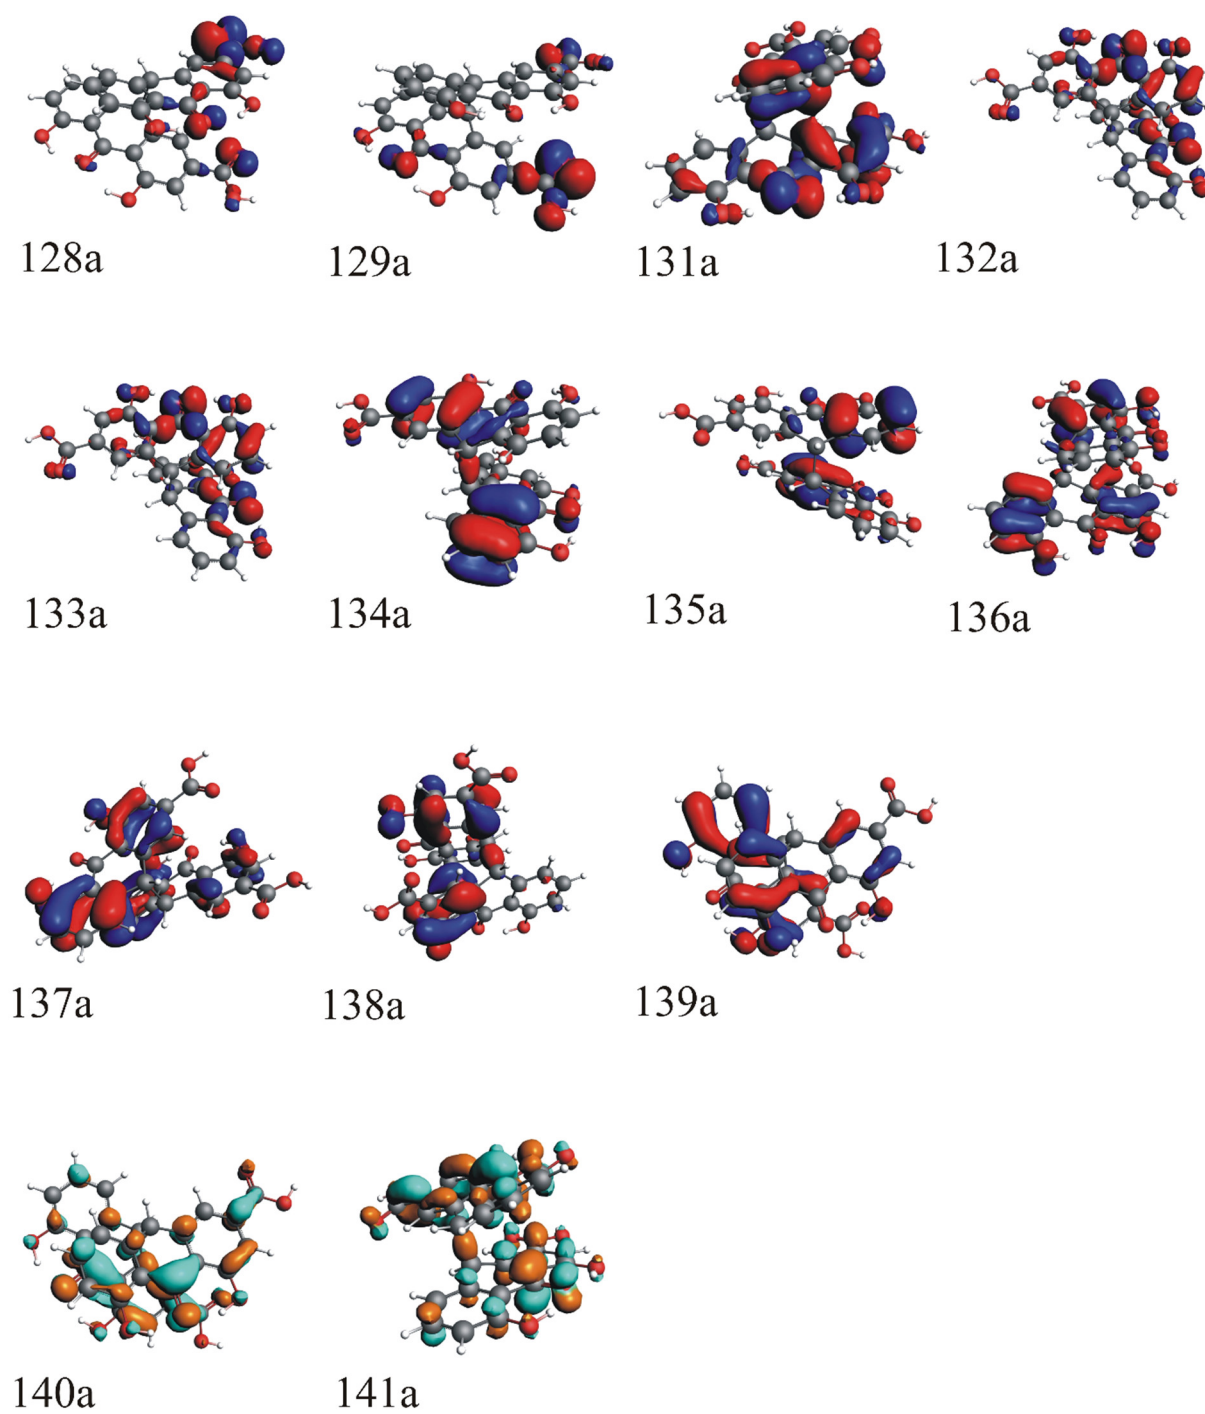

**Figure S4.** Molecular Orbitals for Sennidine B – Structure 7.

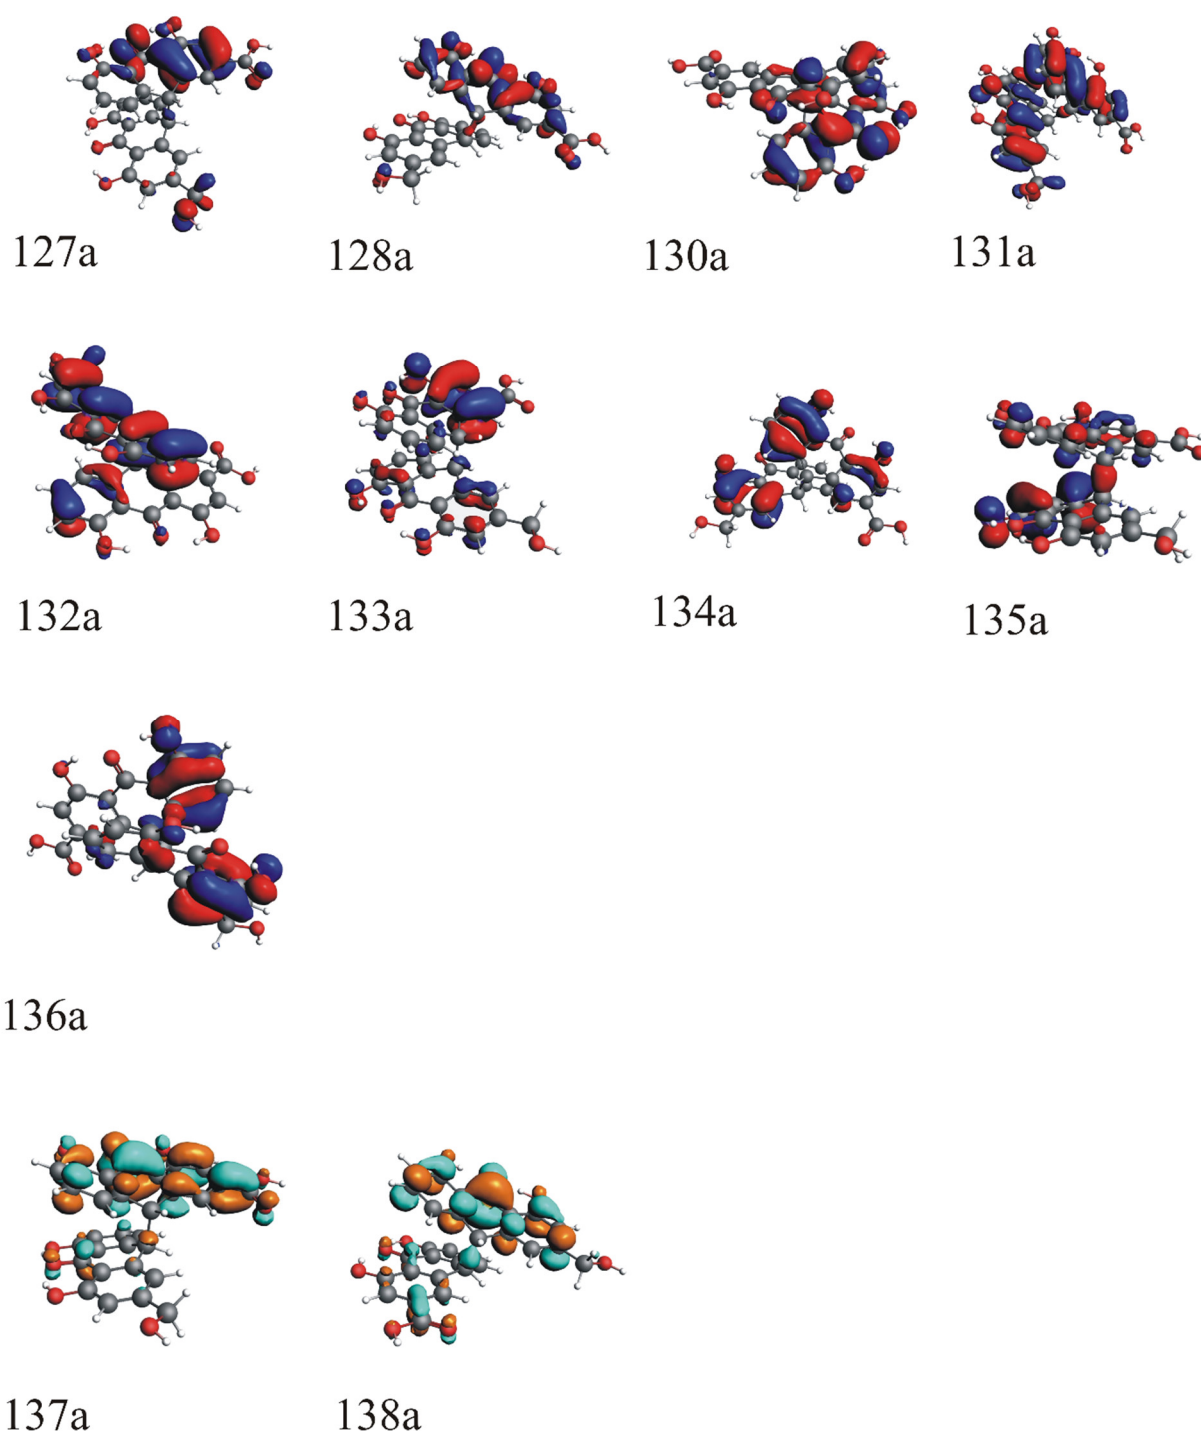

**Figure S5.** Molecular Orbitals for Sennidine C – Structure 11.

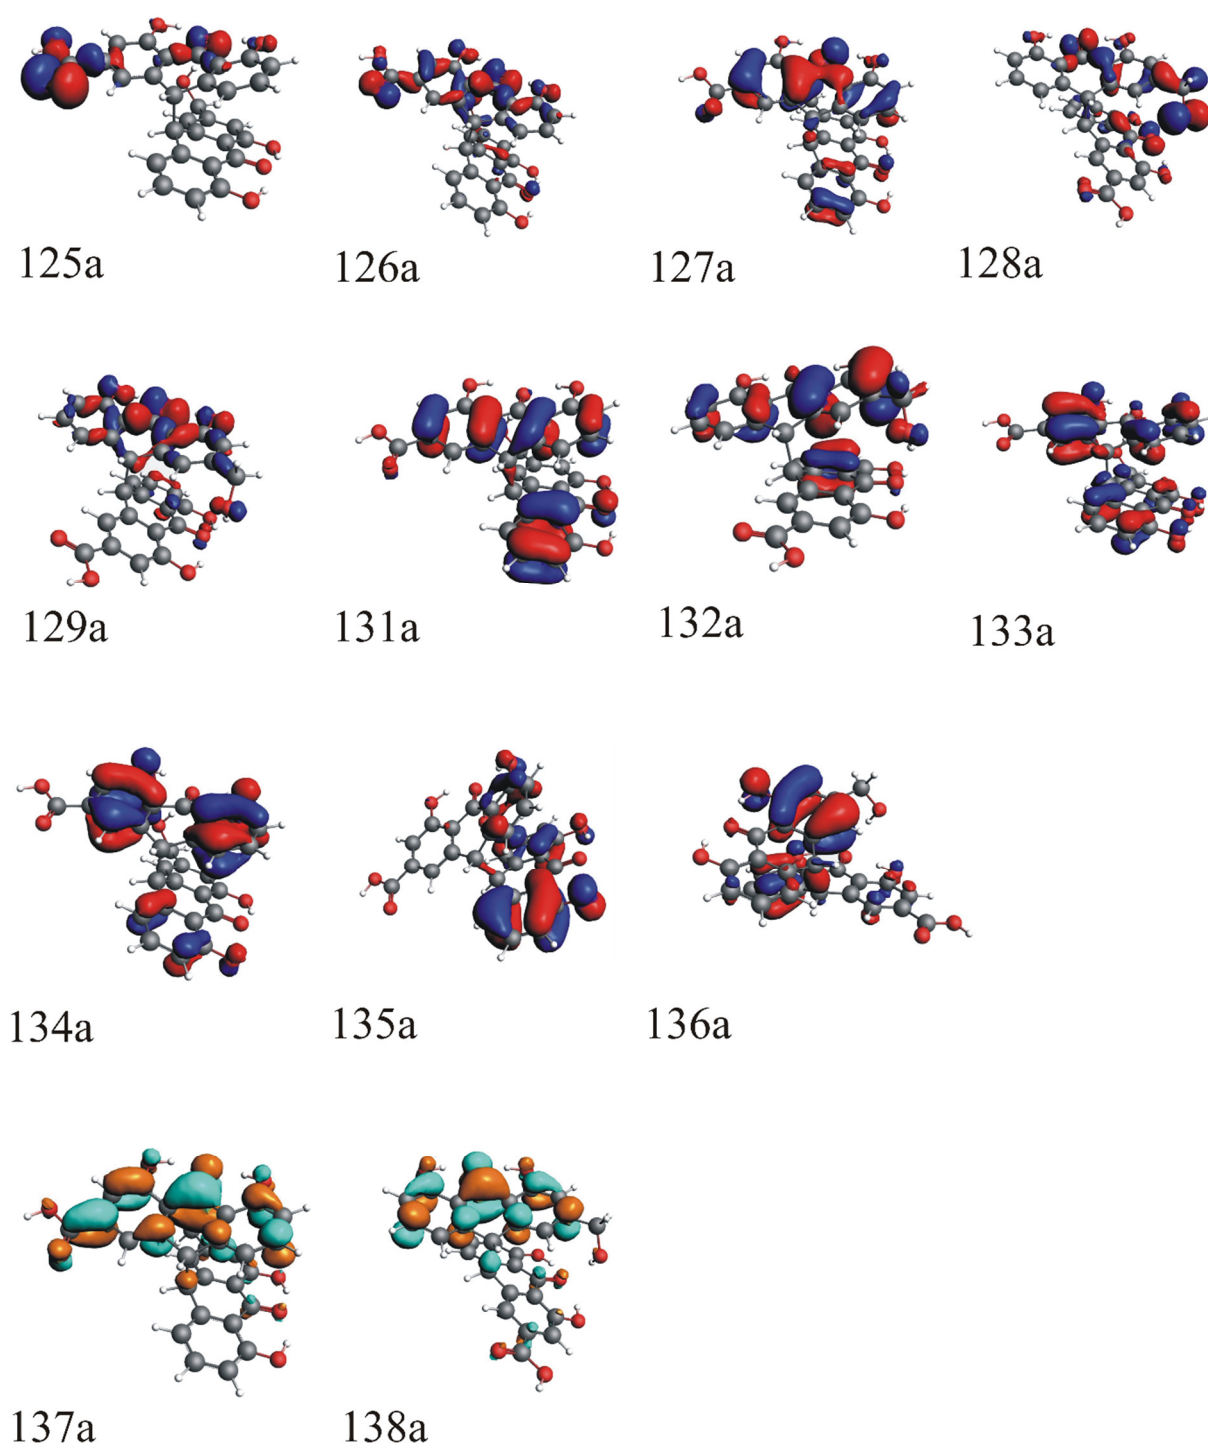

**Figure S6.** Molecular Orbitals for Sennidine D – Structure 17.
